# Supplementary material for: Aqueous solution as a playground of {MoO4}, {Mo4O12}, {Mo8O26}, {Mo8V5O40} and {V7Mo2O27} species in the presence of carboxylic acids and [Co(C2O4)(NH3)4]+ or [Co(en)3]3+ cations
Source: Royal Society of Chemistry journal article supplement (doi:10.1039/d4ce01187b), 2025-01-01
Supplement: d4ce01187b1.pdf [file d4ce01187b1.pdf]

Aqueous solution as a *playground* of  $\{\text{MoO}_4\}$ ,  
 $\{\text{Mo}_4\text{O}_{12}\}$ ,  $\{\text{Mo}_8\text{O}_{26}\}$ ,  $\{\text{Mo}_8\text{V}_5\text{O}_{40}\}$  and  
 $\{\text{V}_7\text{Mo}_2\text{O}_{27}\}$  species in the presence of carboxylic  
acids and  $[\text{Co}(\text{C}_2\text{O}_4)(\text{NH}_3)_4]^+$  or  $[\text{Co}(\text{en})_3]^{3+}$  cations

D. Kuzman<sup>a\*</sup>, V. Damjanović<sup>b</sup>, M. Cindrić<sup>a\*</sup>, V. Vrdoljak<sup>a</sup>

<sup>a</sup>University of Zagreb Faculty of Science, Department of Chemistry, Horvatovac 102a, Zagreb, Croatia

<sup>b</sup>University of Zagreb School of Medicine, Department of Chemistry and Biochemistry, Šalata 3, Zagreb, Croatia

**Table S1.** Reactions of  $\text{Na}_2\text{MoO}_4 \cdot 2\text{H}_2\text{O}$  and  $[\text{Co}(\text{C}_2\text{O}_4)(\text{NH}_3)_4]\text{NO}_3 \cdot \text{H}_2\text{O}$  with 1.22, 2.44, 7.93, and 15.90 mmol of acetic acid.

**Table S2.** Reactions of  $\text{Na}_2\text{MoO}_4 \cdot 2\text{H}_2\text{O}$  and  $[\text{Co}(\text{C}_2\text{O}_4)(\text{NH}_3)_4]\text{NO}_3 \cdot \text{H}_2\text{O}$  with 1.22, 2.44, 7.93, and 15.90 mmol of succinic acid.

**Table S3.** Reactions of  $\text{Na}_2\text{MoO}_4 \cdot 2\text{H}_2\text{O}$  and  $[\text{Co}(\text{CO}_3)(\text{NH}_3)_4]\text{NO}_3 \cdot \text{H}_2\text{O}$  with 1.22, 2.44, 7.93, and 15.90 mmol of acetic or succinic acid.

**Table S4.** Reactions of  $\text{Na}_2\text{MoO}_4 \cdot 2\text{H}_2\text{O}$ ,  $\text{NH}_4\text{VO}_3$  and  $[\text{Co}(\text{C}_2\text{O}_4)(\text{NH}_3)_4]\text{NO}_3 \cdot \text{H}_2\text{O}$  or  $[\text{Co}(\text{CO}_3)(\text{NH}_3)_4]\text{NO}_3 \cdot \text{H}_2\text{O}$  with 1.22, 2.44, 7.93, and 15.90 mmol of succinic acid.

**Table S5.** Reactions of  $\text{Na}_2\text{MoO}_4 \cdot 2\text{H}_2\text{O}$ ,  $\text{NH}_4\text{VO}_3$  and  $[\text{Co}(\text{en})_3]\text{Cl}_3$  or  $[\text{Co}(\text{CO}_3)(\text{NH}_3)_4]\text{NO}_3 \cdot \text{H}_2\text{O}$  with 1.22, 2.44, 7.93, and 15.90 mmol of succinic acid.

**Table S6.** TG data of compounds **1-4**, **6-8**, **10-12**

**Table S7.** IR data for compounds **1-13**

**Table S8.** Analytical data of compounds **1-4**, **6-8**, **10-13**

**Table S9.** Crystallographic data for compounds **1-9**, **11**

**Table S10.** Hydrogen bonds in the compound **4**

**Table S11.** Hydrogen bonds in the compound **8**

**Table S12.** Hydrogen bonds in the compound **9**

**Figure S1.** TG curve of  $[\text{Co}(\text{C}_2\text{O}_4)(\text{NH}_3)_4]_4[\beta\text{-Mo}_8\text{O}_{26}] \cdot 12\text{H}_2\text{O}$  (**1**)

**Figure S2.** TG curve of  $[\text{Co}(\text{C}_2\text{O}_4)(\text{NH}_3)_4]_4[\beta\text{-Mo}_8\text{O}_{26}] \cdot 10\text{H}_2\text{O}$  (**2**)

**Figure S3.** TG curve of  $[\text{Co}(\text{C}_2\text{O}_4)(\text{NH}_3)_4]_{4n}[\text{Na}_2\text{Mo}_8\text{O}_{29}(\text{H}_2\text{O})_4]_n \cdot 6n\text{H}_2\text{O}$  (**3**)

**Figure S4.** TG curve of  $[\text{Co}(\text{C}_2\text{O}_4)(\text{NH}_3)_4]_4[\beta\text{-Mo}_8\text{O}_{26}] \cdot 4\text{H}_2\text{O} \cdot \text{C}_4\text{H}_6\text{O}_4$  (**6**)

**Figure S5.**  $[\text{Co}(\text{C}_2\text{O}_4)(\text{NH}_3)_4]_{2n}[\text{Mo}_4\text{O}_{12}(\text{C}_4\text{H}_4\text{O}_4)]_n \cdot 3n\text{H}_2\text{O}$  (**8**)

**Figure S6.** TG curve of  $[\text{Mo}_5\text{Co}_2\text{O}_{17}(\text{HCO}_3)(\text{H}_4\text{O}_4\text{O}_4\text{H})(\text{NH}_3)_7] \cdot 5\text{H}_2\text{O}$  (**10**)

**Figure S7.** TG curve of  $[\text{Mo}_7\text{Co}_2\text{O}_{18}(\text{NH}_3)_7] \cdot 5\text{H}_2\text{O}$  (**11**)

**Figure S8.** TG curve of  $[\text{Co}(\text{C}_2\text{O}_4)(\text{NH}_3)_4]_2[\text{H}_2\text{Mo}_8\text{V}_5\text{O}_{40}\text{Na}_2(\text{H}_2\text{O})_8] \cdot 5.5\text{H}_2\text{O}$  (**12**)

**Figure S9:**  $^{13}\text{C}$  NMR spectrum of  $[\text{Mo}_5\text{Co}_2\text{O}_{17}(\text{HCO}_3)(\text{H}_4\text{C}_4\text{O}_4\text{H})(\text{NH}_3)_7] \cdot 5\text{H}_2\text{O}$  (**10**)

**Figure S10.** Example of  $^{13}\text{C}$  NMR spectra of  $[\text{Mo}_5\text{Co}_2\text{O}_{18}(\text{NH}_3)_7] \cdot 5\text{H}_2\text{O}$  (**11**) obtained in reactions with succinic acid

**Figure S11.** Simulated and experimental PXRD patterns of **4**

**Figure S12.** Simulated and experimental PXRD patterns of **6**

**Figure S13.** Simulated and experimental PXRD patterns of **7**

**Figure S14.** Simulated and experimental PXRD patterns of **8**

**Figure S15.** Crystals of compounds **3-9**

**Table S1.** Reactions of  $\text{Na}_2\text{MoO}_4 \cdot 2\text{H}_2\text{O}$  and  $[\text{Co}(\text{C}_2\text{O}_4)(\text{NH}_3)_4]\text{NO}_3 \cdot \text{H}_2\text{O}$  with 1.22, 2.44, 7.93, and 15.90 mmol of acetic acid.

| Solution based methods | Precursors / Acid                                                                                                    | Mo : Co : Acid / mmol | Products                                                                                                                                                                                                                                                                                                                |
|------------------------|----------------------------------------------------------------------------------------------------------------------|-----------------------|-------------------------------------------------------------------------------------------------------------------------------------------------------------------------------------------------------------------------------------------------------------------------------------------------------------------------|
| Room temperature       | $\text{Na}_2\text{MoO}_4$ / $[\text{Co}(\text{C}_2\text{O}_4)(\text{NH}_3)_4]\text{NO}_3$ / $\text{CH}_3\text{COOH}$ | 5 : 2 : 1.22          | $[\text{Co}(\text{C}_2\text{O}_4)(\text{NH}_3)_4]_4[\beta\text{-Mo}_8\text{O}_{26}] \cdot 12\text{H}_2\text{O}$ (1)<br>$[\text{Co}(\text{C}_2\text{O}_4)(\text{NH}_3)_4]_4[\beta\text{-Mo}_8\text{O}_{26}] \cdot 10\text{H}_2\text{O}$ (2)                                                                              |
|                        |                                                                                                                      | 5 : 2 : 2.44          |                                                                                                                                                                                                                                                                                                                         |
|                        |                                                                                                                      | 5 : 2 : 7.93          |                                                                                                                                                                                                                                                                                                                         |
|                        |                                                                                                                      | 5 : 2 : 15.90         |                                                                                                                                                                                                                                                                                                                         |
| Reflux                 | $\text{Na}_2\text{MoO}_4$ / $[\text{Co}(\text{C}_2\text{O}_4)(\text{NH}_3)_4]\text{NO}_3$ / $\text{CH}_3\text{COOH}$ | 5 : 2 : 1.22          | $[\text{Co}(\text{C}_2\text{O}_4)(\text{NH}_3)_4]_{4n}[\text{Na}_2\text{Mo}_8\text{O}_{29}(\text{H}_2\text{O})_4]_n \cdot 6n\text{H}_2\text{O}$ (3)                                                                                                                                                                     |
|                        |                                                                                                                      | 5 : 2 : 2.44          |                                                                                                                                                                                                                                                                                                                         |
|                        |                                                                                                                      | 5 : 2 : 7.93          | $[\text{Co}(\text{C}_2\text{O}_4)(\text{NH}_3)_4]_4[\beta\text{-Mo}_8\text{O}_{26}] \cdot 12\text{H}_2\text{O}$ (1)<br>$[\text{Co}(\text{C}_2\text{O}_4)(\text{NH}_3)_4]_{4n}[\text{Na}_2\text{Mo}_8\text{O}_{29}(\text{H}_2\text{O})_4]_n \cdot 6n\text{H}_2\text{O}$ (3)                                              |
|                        |                                                                                                                      | 5 : 2 : 15.90         | $[\text{Co}(\text{C}_2\text{O}_4)(\text{NH}_3)_4]_8[\beta\text{-Mo}_8\text{O}_{26}(\text{H}_2\text{O})_2][\gamma\text{-Mo}_8\text{O}_{26}] \cdot 12\text{H}_2\text{O}$ (4)<br>$[\text{Co}(\text{C}_2\text{O}_4)(\text{NH}_3)_4]_8[\gamma\text{-Mo}_8\text{O}_{26}(\text{H}_2\text{O})_2] \cdot 6\text{H}_2\text{O}$ (5) |
| Solvothermal at 110 °C | $\text{Na}_2\text{MoO}_4$ / $[\text{Co}(\text{C}_2\text{O}_4)(\text{NH}_3)_4]\text{NO}_3$ / $\text{CH}_3\text{COOH}$ | 5 : 2 : 1.22          | $[\text{Co}(\text{C}_2\text{O}_4)(\text{NH}_3)_4]_4[\beta\text{-Mo}_8\text{O}_{26}] \cdot 12\text{H}_2\text{O}$ (1)<br>$[\text{Co}(\text{C}_2\text{O}_4)(\text{NH}_3)_4]_4[\beta\text{-Mo}_8\text{O}_{26}] \cdot 10\text{H}_2\text{O}$ (2)                                                                              |
|                        |                                                                                                                      | 5 : 2 : 2.44          |                                                                                                                                                                                                                                                                                                                         |
|                        |                                                                                                                      | 5 : 2 : 7.93          |                                                                                                                                                                                                                                                                                                                         |
|                        |                                                                                                                      | 5 : 2 : 15.90         |                                                                                                                                                                                                                                                                                                                         |

**Table S2.** Reactions of  $\text{Na}_2\text{MoO}_4 \cdot 2\text{H}_2\text{O}$  and  $[\text{Co}(\text{C}_2\text{O}_4)(\text{NH}_3)_4](\text{NO}_3) \cdot \text{H}_2\text{O}$  with 1.22, 2.44, 7.93, and 15.90 mmol of succinic acid.

| Solution based methods | Precursors / Acid                                                                                                                         | Mo : Co : Acid / mmol | Products                                                                                                                                                                                                                                                                                                                                                                                                                                                                                                                                                                            |
|------------------------|-------------------------------------------------------------------------------------------------------------------------------------------|-----------------------|-------------------------------------------------------------------------------------------------------------------------------------------------------------------------------------------------------------------------------------------------------------------------------------------------------------------------------------------------------------------------------------------------------------------------------------------------------------------------------------------------------------------------------------------------------------------------------------|
| Room temperature       | $\text{Na}_2\text{MoO}_4 /$<br>$[\text{Co}(\text{C}_2\text{O}_4)(\text{NH}_3)_4]\text{NO}_3 /$<br>$\text{HOOCCH}_2\text{CH}_2\text{COOH}$ | 5 : 2 : 1.22          | $[\text{Co}(\text{C}_2\text{O}_4)(\text{NH}_3)_4]_{4n}[\text{Na}_2\text{Mo}_8\text{O}_{29}(\text{H}_2\text{O})_4]_n \cdot 6n\text{H}_2\text{O}$ (3)                                                                                                                                                                                                                                                                                                                                                                                                                                 |
|                        |                                                                                                                                           | 5 : 2 : 2.44          | $[\text{Co}(\text{C}_2\text{O}_4)(\text{NH}_3)_4]_4[\beta\text{-Mo}_8\text{O}_{26}] \cdot 12\text{H}_2\text{O}$ (1)                                                                                                                                                                                                                                                                                                                                                                                                                                                                 |
|                        |                                                                                                                                           | 5 : 2 : 7.93          | $[\text{Co}(\text{C}_2\text{O}_4)(\text{NH}_3)_4]_4[\beta\text{-Mo}_8\text{O}_{26}] \cdot 4\text{H}_2\text{O} \cdot \text{C}_4\text{H}_6\text{O}_4$ (6)                                                                                                                                                                                                                                                                                                                                                                                                                             |
|                        |                                                                                                                                           | 5 : 2 : 15.90         |                                                                                                                                                                                                                                                                                                                                                                                                                                                                                                                                                                                     |
| Reflux                 | $\text{Na}_2\text{MoO}_4 /$<br>$[\text{Co}(\text{C}_2\text{O}_4)(\text{NH}_3)_4]\text{NO}_3 /$<br>$\text{HOOCCH}_2\text{CH}_2\text{COOH}$ | 5 : 2 : 1.22          | $[\text{Co}(\text{C}_2\text{O}_4)(\text{NH}_3)_4]_{4n}[\text{Na}_2\text{Mo}_8\text{O}_{29}(\text{H}_2\text{O})_4]_n \cdot 6n\text{H}_2\text{O}$ (3)                                                                                                                                                                                                                                                                                                                                                                                                                                 |
|                        |                                                                                                                                           | 5 : 2 : 2.44          | $[\text{Co}(\text{C}_2\text{O}_4)(\text{NH}_3)_4]_4[\beta\text{-Mo}_8\text{O}_{26}] \cdot 12\text{H}_2\text{O}$ (1),<br>$[\text{Co}(\text{C}_2\text{O}_4)(\text{NH}_3)_4]_4[\beta\text{-Mo}_8\text{O}_{26}] \cdot 4\text{H}_2\text{O} \cdot \text{C}_4\text{H}_6\text{O}_4$ (6)<br>$[\text{Co}(\text{C}_2\text{O}_4)(\text{NH}_3)_4]_4[\gamma\text{-Mo}_8\text{O}_{26}(\text{H}_2\text{O})_2] \cdot 12\text{H}_2\text{O}$ (7)<br>$[\text{Co}(\text{C}_2\text{O}_4)(\text{NH}_3)_4]_{2n}[\text{Mo}_4\text{O}_{12}(\text{C}_4\text{H}_4\text{O}_4)]_n \cdot 3n\text{H}_2\text{O}$ (8) |
|                        |                                                                                                                                           | 5 : 2 : 7.93          | $[\text{Co}(\text{C}_2\text{O}_4)(\text{NH}_3)_4]_4[\beta\text{-Mo}_8\text{O}_{26}] \cdot 4\text{H}_2\text{O} \cdot \text{C}_4\text{H}_6\text{O}_4$ (6)                                                                                                                                                                                                                                                                                                                                                                                                                             |
|                        |                                                                                                                                           | 5 : 2 : 15.90         |                                                                                                                                                                                                                                                                                                                                                                                                                                                                                                                                                                                     |
|                        |                                                                                                                                           |                       |                                                                                                                                                                                                                                                                                                                                                                                                                                                                                                                                                                                     |
| Solvothermal at 110 °C | $\text{Na}_2\text{MoO}_4 /$<br>$[\text{Co}(\text{C}_2\text{O}_4)(\text{NH}_3)_4]\text{NO}_3 /$<br>$\text{HOOCCH}_2\text{CH}_2\text{COOH}$ | 5 : 2 : 1.22          | $[\text{Co}(\text{C}_2\text{O}_4)(\text{NH}_3)_4]_{4n}[\text{Na}_2\text{Mo}_8\text{O}_{29}(\text{H}_2\text{O})_4]_n \cdot 6n\text{H}_2\text{O}$ (3)                                                                                                                                                                                                                                                                                                                                                                                                                                 |
|                        |                                                                                                                                           | 5 : 2 : 2.44          | $[\text{Co}(\text{C}_2\text{O}_4)(\text{NH}_3)_4]_4[\beta\text{-Mo}_8\text{O}_{26}] \cdot 4\text{H}_2\text{O} \cdot \text{C}_4\text{H}_6\text{O}_4$ (6)                                                                                                                                                                                                                                                                                                                                                                                                                             |
|                        |                                                                                                                                           | 5 : 2 : 7.93          | $[\text{Co}(\text{C}_2\text{O}_4)(\text{NH}_3)_4]_4[\beta\text{-Mo}_8\text{O}_{26}] \cdot 4\text{H}_2\text{O} \cdot \text{C}_4\text{H}_6\text{O}_4$ (6)<br>$[\text{Co}(\text{C}_2\text{O}_4)(\text{NH}_3)_4]_{4n}[\gamma\text{-Mo}_8\text{O}_{26}]_2 \cdot 9n\text{H}_2\text{O}$ (9)                                                                                                                                                                                                                                                                                                |
|                        |                                                                                                                                           | 5 : 2 : 15.90         |                                                                                                                                                                                                                                                                                                                                                                                                                                                                                                                                                                                     |

**Table S3.** Reactions of  $\text{Na}_2\text{MoO}_4 \cdot 2\text{H}_2\text{O}$  and  $[\text{Co}(\text{CO}_3)(\text{NH}_3)_4](\text{NO}_3) \cdot \text{H}_2\text{O}$  with 1.22, 2.44, 7.93, and 15.90 mmol of acetic or succinic acid.

| Solution based methods | Precursors / Acid                                                                                                                                      | Mo : Co : Acid / mmol | Products                                                                                                                                                                                                                             |
|------------------------|--------------------------------------------------------------------------------------------------------------------------------------------------------|-----------------------|--------------------------------------------------------------------------------------------------------------------------------------------------------------------------------------------------------------------------------------|
| Room temperature       | $\text{Na}_2\text{MoO}_4$ / $[\text{Co}(\text{CO}_3)(\text{NH}_3)_4]^+$ / $\text{CH}_3\text{COOH}$ or $\text{HOOCCH}_2\text{CH}_2\text{COOH}$          | 5 : 2 : 1.22          | $[\text{Mo}_5\text{Co}_2\text{O}_{17}(\text{HCO}_3)(\text{H}_4\text{C}_4\text{O}_4\text{H})(\text{NH}_3)_7] \cdot 5\text{H}_2\text{O}$ (10)<br>$[\text{Mo}_5\text{Co}_2\text{O}_{18}(\text{NH}_3)_7] \cdot 5\text{H}_2\text{O}$ (11) |
|                        |                                                                                                                                                        | 5 : 2 : 2.44          |                                                                                                                                                                                                                                      |
|                        |                                                                                                                                                        | 5 : 2 : 7.93          |                                                                                                                                                                                                                                      |
|                        |                                                                                                                                                        | 5 : 2 : 15.90         |                                                                                                                                                                                                                                      |
| Reflux                 | $\text{Na}_2\text{MoO}_4$ / $[\text{Co}(\text{CO}_3)(\text{NH}_3)_4]^+$ / $\text{CH}_3\text{COOH}$ or $\text{HOOCCH}_2\text{CH}_2\text{COOH}$          | 5 : 2 : 1.22          | unidentified black-brown precipitate                                                                                                                                                                                                 |
|                        |                                                                                                                                                        | 5 : 2 : 2.44          |                                                                                                                                                                                                                                      |
|                        |                                                                                                                                                        | 5 : 2 : 7.93          | $[\text{Mo}_5\text{Co}_2\text{O}_{17}(\text{HCO}_3)(\text{H}_4\text{C}_4\text{O}_4\text{H})(\text{NH}_3)_7] \cdot 5\text{H}_2\text{O}$ (10)<br>$[\text{Mo}_5\text{Co}_2\text{O}_{18}(\text{NH}_3)_7] \cdot 5\text{H}_2\text{O}$ (11) |
|                        |                                                                                                                                                        | 5 : 2 : 15.90         |                                                                                                                                                                                                                                      |
| Solvothermal at 110 °C | $\text{Na}_2\text{MoO}_4$ / $[\text{Co}(\text{CO}_3)(\text{NH}_3)_4]\text{NO}_3$ / $\text{CH}_3\text{COOH}$ or $\text{HOOCCH}_2\text{CH}_2\text{COOH}$ | 5 : 2 : 1.22          | unidentified black-brown precipitate                                                                                                                                                                                                 |
|                        |                                                                                                                                                        | 5 : 2 : 2.44          |                                                                                                                                                                                                                                      |
|                        |                                                                                                                                                        | 5 : 2 : 7.93          | $[\text{Mo}_5\text{Co}_2\text{O}_{17}(\text{HCO}_3)(\text{H}_4\text{C}_4\text{O}_4\text{H})(\text{NH}_3)_7] \cdot 5\text{H}_2\text{O}$ (10)<br>$[\text{Mo}_5\text{Co}_2\text{O}_{18}(\text{NH}_3)_7] \cdot 5\text{H}_2\text{O}$ (11) |
|                        |                                                                                                                                                        | 5 : 2 : 15.90         |                                                                                                                                                                                                                                      |

**Table S4.** Reactions of  $\text{Na}_2\text{MoO}_4 \cdot 2\text{H}_2\text{O}$ ,  $\text{NH}_4\text{VO}_3$  and  $[\text{Co}(\text{C}_2\text{O}_4)(\text{NH}_3)_4](\text{NO}_3) \cdot \text{H}_2\text{O}$  or  $[\text{Co}(\text{CO}_3)(\text{NH}_3)_4](\text{NO}_3) \cdot \text{H}_2\text{O}$  with 1.22, 2.44, 7.93, and 15.90 mmol of succinic acid.

| Solution based methods                                                            | Precursors / Acid                                                                                                                                           | Mo : Co : V : Acid / mmol | Products                                                                                                                                                            |
|-----------------------------------------------------------------------------------|-------------------------------------------------------------------------------------------------------------------------------------------------------------|---------------------------|---------------------------------------------------------------------------------------------------------------------------------------------------------------------|
| Room temperature /<br>Reflux /<br>Solvothermal at 110 °C /<br>accelerated milling | $\text{Na}_2\text{MoO}_4 / \text{NH}_4\text{VO}_3$<br><br>$[\text{Co}(\text{C}_2\text{O}_4)(\text{NH}_3)_4]^+ /$<br>$\text{CH}_3\text{COOH}$                | 5 : 2 : 2 : 1.22          | $[\text{Co}(\text{C}_2\text{O}_4)(\text{NH}_3)_4]_2[\text{H}_2\text{Mo}_8\text{V}_5\text{O}_{40}\text{Na}_2(\text{H}_2\text{O})_8] \cdot 5.5\text{H}_2\text{O}(12)$ |
|                                                                                   |                                                                                                                                                             | 5 : 2 : 2 : 2.44          |                                                                                                                                                                     |
|                                                                                   |                                                                                                                                                             | 5 : 2 : 2 : 7.93          |                                                                                                                                                                     |
|                                                                                   |                                                                                                                                                             | 5 : 2 : 2 : 15.90         |                                                                                                                                                                     |
| Room temperature /<br>Reflux /<br>Solvothermal at 110 °C                          | $\text{Na}_2\text{MoO}_4 / \text{NH}_4\text{VO}_3$<br><br>$[\text{Co}(\text{C}_2\text{O}_4)(\text{NH}_3)_4]^+ /$<br>$\text{HOOCCH}_2\text{CH}_2\text{COOH}$ | 5 : 2 : 2 : 1.22          | heterogenous solid mixture                                                                                                                                          |
|                                                                                   |                                                                                                                                                             | 5 : 2 : 2 : 2.44          |                                                                                                                                                                     |
|                                                                                   |                                                                                                                                                             | 5 : 2 : 2 : 7.93          |                                                                                                                                                                     |
|                                                                                   |                                                                                                                                                             | 5 : 2 : 2 : 15.90         |                                                                                                                                                                     |
| Room temperature /<br>Reflux /<br>Solvothermal at 110 °C                          | $\text{Na}_2\text{MoO}_4 / \text{NH}_4\text{VO}_3$<br><br>$[\text{Co}(\text{CO}_3)(\text{NH}_3)_4]^+ /$<br>$\text{HOOCCH}_2\text{CH}_2\text{COOH}$          | 5 : 2 : 2 : 1.22          | heterogenous solid mixture                                                                                                                                          |
|                                                                                   |                                                                                                                                                             | 5 : 2 : 2 : 2.44          |                                                                                                                                                                     |
|                                                                                   |                                                                                                                                                             | 5 : 2 : 2 : 7.93          |                                                                                                                                                                     |
|                                                                                   |                                                                                                                                                             | 5 : 2 : 2 : 15.90         |                                                                                                                                                                     |

**Table S5.** Reactions of  $\text{Na}_2\text{MoO}_4 \cdot 2\text{H}_2\text{O}$ ,  $\text{NH}_4\text{VO}_3$  and  $[\text{Co}(\text{en})_3]\text{Cl}_3$  or  $[\text{Co}(\text{CO}_3)(\text{NH}_3)_4](\text{NO}_3) \cdot \text{H}_2\text{O}$  with 1.22, 2.44, 7.93, and 15.90 mmol of succinic acid.

| Solution based methods                                   | Precursors / Acid                                          | Mo : Co : Acid / mmol | Products                                                                                                    |
|----------------------------------------------------------|------------------------------------------------------------|-----------------------|-------------------------------------------------------------------------------------------------------------|
| Room temperature /<br>Reflux /<br>Solvothermal at 110 °C | $\text{Na}_2\text{MoO}_4 / \text{NH}_4\text{VO}_3$         | 5 : 2 : 2: 1.22       | heterogenous solid mixture                                                                                  |
|                                                          | $[\text{Co}(\text{en})_3]^{3+} /$                          | 5 : 2 : 2: 2.44       |                                                                                                             |
|                                                          | $\text{CH}_3\text{COOH}$ or                                | 5 : 2 : 2: 7.93       |                                                                                                             |
|                                                          | $\text{HOOCCH}_2\text{CH}_2\text{COOH}$                    | 5 : 2 : 2: 15.90      |                                                                                                             |
| Accelerated ageing                                       | $\text{Na}_2\text{MoO}_4 / \text{NH}_4\text{VO}_3$         | 5 : 2 : 2: 1.22       | $\text{Na}_3[\text{Co}(\text{en})_3][\text{HV}_7\text{Mo}_2\text{O}_{27}] \cdot 18\text{H}_2\text{O}$ (13). |
|                                                          | $[\text{Co}(\text{en})_3]^{3+} /$                          | 5 : 2 : 2: 2.44       |                                                                                                             |
|                                                          | $\text{CH}_3\text{COOH}$ or                                | 5 : 2 : 2: 7.93       |                                                                                                             |
|                                                          | $\text{HOOCCH}_2\text{CH}_2\text{COOH}$<br>or without acid | 5 : 2 : 2: 15.90      |                                                                                                             |

**Table S6.** TG data of compounds **1-4, 6-8, 10-12**

|    | 1 <sup>st</sup> | 2 <sup>nd</sup> | 3 <sup>rd</sup> |
|----|-----------------|-----------------|-----------------|
| 1  | 9.15 %          | 18.56 %         | 6.28 %          |
|    | 36-146 °C       | 146-316 °C      | 316-361 °C      |
| 2  | 8.46 %          | 19.23 %         | 7.09 %          |
|    | 46-155 °C       | 155-316 °C      | 316-398 °C      |
| 3  | 5.22 %          | 19.49 %         | 5.88 %          |
|    | 37-166 °C       | 166-287 °C      | 287-353 °C      |
| 4  | 22.86 %         | 12.12 %         | 10.93 %         |
|    | 126-206 °C      | 206-297 °C      | 297-434 °C      |
| 6  | 24.34 %         | 10.98 %         | 4.23 %          |
|    | 36-103 °C       | 103-331 °C      | 331-499 °C      |
| 7  | 23.34 %         | 10.78 %         |                 |
|    | 33-291 °C       | 291-383 °C      |                 |
| 8  | 4.95 %          | 23.71 %         | 11.17 %         |
|    | 39-100 °C       | 120-300 °C      | 320-385 °C      |
| 10 | 8.11 %          | 21.19 %         | 9.02 %          |
|    | 28-155 °C       | 155-298 °C      | 298-395 °C      |
| 11 | 9.14 %          | 10.58 %         | 1.64 %          |
|    | 32-154 °C       | 154-298 °C      | 298-365 °C      |
| 12 | 6.89 %          | 24.16 °C        | 3.52 %          |
|    | 40-282 °C       | 282-342 °C      | 342-389 °C      |

\*Mass of compounds **5, 9** and **13** was insufficient for thermogravimetric analysis



**Table S7.** IR data for compounds **1-13**

|                                                                                                  | $\nu_s(\text{M}=\text{O}_t)$<br>+<br>$\nu_a(\text{Mo}=\text{O}_t)$<br>M = Mo or/<br>and V | $\nu_s(\text{M}-\text{O}-\text{M})+$<br>$\nu_a(\text{M}-\text{O}-\text{M})$<br>M = Mo or/<br>and V | $\nu(\text{Mo}-\text{O}$ in<br>$\text{Mo}-\text{O}-\text{Mo})$<br>M = Mo or/<br>and V | $\nu_s(\text{N}-\text{H})$<br>+<br>$\nu_s(\text{O}-\text{H})$ | $\delta_s(\text{N}-\text{H})$ | $\nu_s(\text{C}-\text{O})$ | $\nu_s(\text{C}-\text{O})$<br>+<br>$\nu(\text{C}-\text{C})$ |
|--------------------------------------------------------------------------------------------------|-------------------------------------------------------------------------------------------|----------------------------------------------------------------------------------------------------|---------------------------------------------------------------------------------------|---------------------------------------------------------------|-------------------------------|----------------------------|-------------------------------------------------------------|
| <b>Na<sub>2</sub>MoO<sub>4</sub>·2H<sub>2</sub>O</b>                                             | 953                                                                                       | 797, 741                                                                                           | 598                                                                                   |                                                               |                               |                            |                                                             |
| <b>[Co(C<sub>2</sub>O<sub>4</sub>)(NH<sub>3</sub>)<sub>4</sub>]NO<sub>3</sub>·H<sub>2</sub>O</b> |                                                                                           |                                                                                                    |                                                                                       | 3180, 3269,<br>3492                                           | 1304, 1278                    |                            | 1632, 1417, 1364                                            |
| <b>[Co(CO<sub>3</sub>)(NH<sub>3</sub>)<sub>4</sub>]NO<sub>3</sub>·H<sub>2</sub>O</b>             |                                                                                           |                                                                                                    |                                                                                       | 3297                                                          | 1382, 1281                    | 1612                       |                                                             |
| <b>[Co(en)<sub>3</sub>]Cl<sub>3</sub></b>                                                        |                                                                                           |                                                                                                    |                                                                                       |                                                               |                               |                            |                                                             |
| <b>Succinic acid</b>                                                                             |                                                                                           |                                                                                                    |                                                                                       |                                                               |                               | 1719, 1723                 | 1575, 1566, 1550,<br>1398,                                  |
| <b>1</b>                                                                                         | 956, 900                                                                                  | 800, 762                                                                                           | 536, 481                                                                              | 3297-2927                                                     | 1311, 1222                    | 1705, 1668                 | 1381, 1318                                                  |
| <b>2</b>                                                                                         | 955, 935                                                                                  | 809, 788                                                                                           | 540, 488                                                                              | 3498, 3281                                                    | 1345, 1239                    | 1734, 1700                 | 1402, 1346                                                  |
| <b>3</b>                                                                                         | 944, 935                                                                                  | 778, 765                                                                                           | 525, 483                                                                              | 3493 - 3185                                                   | 1345, 1198                    | 1669, 1654                 | 1430, 1322                                                  |
| <b>4</b>                                                                                         | 935, 912                                                                                  | 802, 777                                                                                           | 540, 478                                                                              | 3387, 3289                                                    | 1334, 1190                    | 1672, 1666                 | 1423, 1311                                                  |
| <b>5</b>                                                                                         | 980, 841                                                                                  | 800, 756                                                                                           | 555, 467                                                                              | 3100-2890                                                     | 1300, 1298                    | 1700, 1687                 | 1513, 1470                                                  |
| <b>6</b>                                                                                         | 977, 908                                                                                  | 810, 798                                                                                           | 567, 544                                                                              | 3308, 3198                                                    | 1309, 1234                    | 1718, 1744                 | 1560, 1499, 1359                                            |
| <b>7</b>                                                                                         | 954, 902                                                                                  | 796, 765                                                                                           | 535, 474                                                                              | 3390, 3076                                                    | 1299, 1198                    | 1704, 1680                 | 1393, 1326, 1249                                            |
| <b>8</b>                                                                                         | 976, 891                                                                                  | 786, 770                                                                                           | 555, 467                                                                              | 3100-2890                                                     | 1300, 1298                    | 1700, 1687                 | 1513, 1470                                                  |
| <b>9</b>                                                                                         | 993, 945, 899                                                                             | 756, 723                                                                                           | 525, 483                                                                              | 3493 - 3185                                                   | 1320, 1222                    | 1723, 1698                 | 1500, 1455                                                  |
| <b>10</b>                                                                                        | 882, 822                                                                                  | 832, 722                                                                                           | 538, 474                                                                              | 2990-2879                                                     | 1329, 1220                    | 1699, 1685                 | 1307, 1289                                                  |
| <b>11</b>                                                                                        | 884, 841                                                                                  | 836, 831                                                                                           | 575, 484                                                                              | 3278                                                          | 1278, 1234                    |                            |                                                             |
| <b>12</b>                                                                                        | 938, 874                                                                                  | 825, 803                                                                                           | 687, 648                                                                              | 3125                                                          | 1311, 1264                    | 1698, 1672                 | 1409                                                        |
| <b>13</b>                                                                                        | 945, 853                                                                                  | 824, 769                                                                                           | 665, 627                                                                              | 3230, 3125                                                    | 1324, 1222                    |                            |                                                             |

**Table S8.** Analytical data of compounds **1-4, 6-8, 10-13**

| (Compound)<br>molecular formula                                                                          | Analytical data          |       |      |       |      |      |       |                        |       |      |       |      |      |       |
|----------------------------------------------------------------------------------------------------------|--------------------------|-------|------|-------|------|------|-------|------------------------|-------|------|-------|------|------|-------|
|                                                                                                          | $w_{\text{calcd.}} (\%)$ |       |      |       |      |      |       | $w_{\text{exp.}} (\%)$ |       |      |       |      |      |       |
|                                                                                                          | Co                       | Mo    | Na   | V     | C    | H    | N     | Co                     | Mo    | Na   | V     | C    | H    | N     |
| (1)<br>$\text{C}_8\text{H}_{72}\text{Co}_4\text{Mo}_8\text{N}_{16}\text{O}_{54}$                         | 10.43                    | 33.96 |      |       | 4.25 | 3.21 | 9.92  | 10.36                  | 33.73 |      |       | 4.17 | 2.72 | 9.88  |
| (2)<br>$\text{C}_8\text{H}_{68}\text{Co}_4\text{Mo}_8\text{N}_{16}\text{O}_{52}$                         | 10.60                    | 34.52 |      |       | 4.32 | 3.08 | 10.08 | 10.45                  | 34.23 |      |       | 4.18 | 3.01 | 9.89  |
| (3)<br>$\text{C}_8\text{H}_{68}\text{Co}_4\text{Mo}_8\text{N}_{16}\text{Na}_2\text{O}_{55}$              | 10.17                    | 33.12 | 1.98 |       | 4.14 | 2.96 | 9.67  | 10.22                  | 33.07 | 1.89 |       | 4.03 | 2.87 | 9.54  |
| (4)<br>$\text{C}_{16}\text{H}_{124}\text{Co}_8\text{Mo}_{16}\text{N}_{32}\text{O}_{98}$                  | 10.86                    | 35.37 |      |       | 4.43 | 2.88 | 10.59 | 11.02                  | 35.97 |      |       | 4.41 | 2.79 | 10.39 |
| (6)<br>$\text{C}_{12}\text{H}_{62}\text{Co}_4\text{Mo}_8\text{N}_{16}\text{O}_{50}$                      | 10.55                    | 34.36 |      |       | 6.45 | 2.80 | 10.03 | 10.47                  | 34.58 |      |       | 6.52 | 2.67 | 10.18 |
| (7)<br>$\text{C}_8\text{H}_{76}\text{Co}_4\text{Mo}_8\text{N}_{16}\text{O}_{56}$                         | 10.27                    | 33.43 |      |       | 4.18 | 3.34 | 9.76  | 10.20                  | 33.14 |      |       | 4.15 | 3.23 | 9.58  |
| (8)<br>$\text{C}_8\text{H}_{34}\text{Co}_2\text{Mo}_4\text{N}_8\text{O}_{27}$                            | 10.02                    | 32.64 |      |       | 8.17 | 2.91 | 9.53  | 10.12                  | 32.44 |      |       | 8.05 | 2.81 | 9.38  |
| (10)<br>$\text{C}_5\text{H}_{37}\text{Co}_2\text{Mo}_5\text{N}_7\text{O}_{29}$                           | 9.38                     | 38.16 |      |       | 4.78 | 2.97 | 7.80  | 9.22                   | 38.20 |      |       | 4.55 | 2.81 | 7.88  |
| (11)<br>$\text{H}_{31}\text{Co}_2\text{Mo}_3\text{N}_7\text{O}_{23}$                                     | 10.76                    | 43.81 |      |       |      | 2.85 | 8.96  | 10.57                  | 43.87 |      |       |      | 2.73 | 8.81  |
| (12)<br>$\text{C}_6\text{H}_{57}\text{Co}_3\text{Mo}_8\text{N}_{12}\text{Na}_2\text{O}_{62.5}\text{V}_5$ | 6.98                     | 30.28 | 1.81 | 10.08 | 2.84 | 2.27 | 6.63  | 6.88                   | 30.09 | 1.89 | 10.10 | 2.83 | 2.22 | 6.75  |
| (13)<br>$\text{C}_6\text{H}_{60}\text{CoMo}_2\text{N}_6\text{Na}_3\text{O}_{45}\text{V}_7$               | 3.65                     | 11.90 | 4.28 | 22.11 | 4.47 | 3.75 | 5.21  | 3.33                   | 11.45 | 4.18 | 22.05 | 4.40 | 3.62 | 5.11  |

\*Mass of compounds **5** and **9** was insufficient for elemental analysis

|                | <b>4</b>                               | <b>5</b>                        | <b>6</b>                           |
|----------------|----------------------------------------|---------------------------------|------------------------------------|
| Formula        | $C_{16}H_{124}Co_8Mo_{16}N_{32}O_{98}$ | $C_8H_{64}Co_4Mo_8N_{16}O_{50}$ | $C_{12}H_{62}Co_4Mo_8N_{16}O_{50}$ |
| $M_r$          | 4339.94                                | 2187.99                         | 2234.01                            |
| Crystal system | triclinic                              | monoclinic                      | triclinic                          |
| Space group    | $P-1$                                  | $P2_1/c$                        | $P-1$                              |
| $a/\text{\AA}$ | 11.7837(3)                             | 9.99760(10)                     | 8.4824(2)                          |

**Table S9.** Crystallographic data for compounds **1-9**, and **11**; for **12** and **13** are given data for unit cell

|                                              | <b>1</b>                        | <b>2</b>                        | <b>3</b>                            |
|----------------------------------------------|---------------------------------|---------------------------------|-------------------------------------|
| Formula                                      | $C_8H_{72}Co_4Mo_8N_{16}O_{54}$ | $C_8H_{68}Co_4Mo_8N_{16}O_{52}$ | $C_8H_{68}Co_4Mo_8N_{16}Na_2O_{55}$ |
| $M_r$                                        | 2260.05                         | 2224.02                         | 2318.16                             |
| Crystal system                               | triclinic                       | triclinic                       | triclinic                           |
| Space group                                  | $P-1$                           | $P-1$                           | $P-1$                               |
| $a/\text{\AA}$                               | 8.51130(10)                     | 8.51020(10)                     | 9.4465(3)                           |
| $b/\text{\AA}$                               | 13.7625(2)                      | 13.7353(2)                      | 10.7769(3)                          |
| $c/\text{\AA}$                               | 13.9561(2)                      | 13.95510(10)                    | 15.2702(4)                          |
| $\alpha/^\circ$                              | 93.0160(10)                     | 95.0810(10)                     | 106.856(2)                          |
| $\beta/^\circ$                               | 107.3180(10)                    | 107.1720(10)                    | 93.852(2)                           |
| $\gamma/^\circ$                              | 103.2230(10)                    | 102.5790(10)                    | 96.451(2)                           |
| $V/\text{\AA}^3$                             | 1506.42(4)                      | 1500.51(3)                      | 1470.20(7)                          |
| $Z$                                          | 1                               | 1                               | 1                                   |
| Reflections unique                           | 45721                           | 38779                           | 18029                               |
| Reflections observed [ $I \geq 2\sigma(I)$ ] | 6014                            | 5998                            | 5951                                |
| Parameters                                   | 427                             | 424                             | 443                                 |
| $R_1(\text{obs})$                            | 0.0613                          | 0.0326                          | 0.0355                              |
| $wR_2(\text{obs})$                           | 0.1710                          | 0.0857                          | 0.0995                              |
| $Goof$                                       | 1.067                           | 1.044                           | 1.073                               |

|                                              |             |             |             |
|----------------------------------------------|-------------|-------------|-------------|
| $b/\text{\AA}$                               | 12.5652(2)  | 20.6814(3)  | 13.3673(2)  |
| $c/\text{\AA}$                               | 20.6823(4)  | 13.4605(2)  | 14.0305(2)  |
| $\alpha/^\circ$                              | 91.8640(10) | 90          | 84.2600(10) |
| $\beta/^\circ$                               | 101.574(2)  | 95.0550(10) | 73.105(2)   |
| $\gamma/^\circ$                              | 99.735(2)   | 90          | 71.519(2)   |
| $V/\text{\AA}^3$                             | 2949.84(11) | 2772.33(6)  | 1443.65(5)  |
| $Z$                                          | 1           | 2           | 1           |
| Reflections unique                           | 43082       | 21943       | 34979       |
| Reflections observed [ $I \geq 2\sigma(I)$ ] | 12083       | 5636        | 5921        |
| Parameters                                   | 765         | 395         | 422         |
| $R_1(\text{obs})$                            | 0.0595      | 0.0553      | 0.0316      |
| $wR_2(\text{obs})$                           | 0.1742      | 0.1561      | 0.0902      |
| $\text{Goof}$                                | 1.038       | 1.057       | 1.075       |

|                | <b>7</b>                                                                  | <b>8</b>                                                               | <b>9</b>                                                                  |
|----------------|---------------------------------------------------------------------------|------------------------------------------------------------------------|---------------------------------------------------------------------------|
| Formula        | $\text{C}_8\text{H}_{76}\text{Co}_4\text{Mo}_8\text{N}_{16}\text{O}_{56}$ | $\text{C}_8\text{H}_{34}\text{Co}_2\text{Mo}_4\text{N}_8\text{O}_{27}$ | $\text{C}_8\text{H}_{66}\text{Co}_4\text{Mo}_8\text{N}_{16}\text{O}_{51}$ |
| $M_r$          | 2296.01                                                                   | 1176.05                                                                | 2206.00                                                                   |
| Crystal system | triclinic                                                                 | monoclinic                                                             | triclinic                                                                 |

| Space group                                      | <i>P</i> -1 | <i>I</i> 2/ <i>a</i> | <i>P</i> -1 |
|--------------------------------------------------|-------------|----------------------|-------------|
| <i>a</i> /Å                                      | 11.5181(3)  | 27.0622(3)           | 7.9160(2)   |
| <i>b</i> /Å                                      | 12.4156(3)  | 7.36240(10)          | 12.5833(3)  |
| <i>c</i> /Å                                      | 12.6190(2)  | 33.9652(4)           | 15.4115(3)  |
| $\alpha$ /°                                      | 89.522(2)   | 90                   | 108.216(2)  |
| $\beta$ /°                                       | 65.036(2)   | 92.8440(10)          | 94.540(2)   |
| $\gamma$ /°                                      | 70.301(2)   | 90                   | 103.045(2)  |
| <i>V</i> /Å <sup>3</sup>                         | 1521.15(7)  | 6758.98(14)          | 1401.85(6)  |
| <i>Z</i>                                         | 1           | 8                    | 1           |
| Reflections unique                               | 18953       | 89140                | 44530       |
| Reflections observed [ <i>I</i> ≥2σ( <i>I</i> )] | 6151        | 7091                 | 5969        |
| Parameters                                       | 454         | 459                  | 406         |
| <i>R</i> <sub>1</sub> (obs)                      | 0.0414      | 0.0523               | 0.0555      |
| <i>wR</i> <sub>2</sub> (obs)                     | 0.1113      | 0.1464               | 0.1546      |
| <i>Goof</i>                                      | 1.032       | 1.050                | 1.116       |

|                                              | <b>11</b>                                                    | <b>12</b>                                                                                        | <b>13</b>                                                                          |
|----------------------------------------------|--------------------------------------------------------------|--------------------------------------------------------------------------------------------------|------------------------------------------------------------------------------------|
| Formula                                      | $\text{Co}_2\text{H}_{31}\text{Mo}_5\text{N}_7\text{O}_{23}$ | $\text{C}_6\text{H}_{57}\text{Co}_3\text{Mo}_8\text{N}_{12}\text{Na}_2\text{O}_{62.5}\text{V}_5$ | $\text{C}_6\text{H}_{60}\text{CoMo}_2\text{N}_6\text{Na}_3\text{O}_{45}\text{V}_7$ |
| $M_r$                                        | 1094.83                                                      | 2542.63                                                                                          | 1612.95                                                                            |
| Crystal system                               | monoclinic                                                   | triclinic                                                                                        | monoclinic                                                                         |
| Space group                                  | $P2_1/n$                                                     | $P-1$                                                                                            | $P-1$                                                                              |
| $a/\text{\AA}$                               | 9.3392(4)                                                    | 13.2251(3)                                                                                       | 12.1225(2)                                                                         |
| $b/\text{\AA}$                               | 28.0114(9)                                                   | 15.9667(3)                                                                                       | 13.4878(2)                                                                         |
| $c/\text{\AA}$                               | 9.6973(4)                                                    | 16.2567(5)                                                                                       | 14.4274(2)                                                                         |
| $\alpha/^\circ$                              | 90                                                           | 86.364(2)                                                                                        | 92.9430(10)                                                                        |
| $\beta/^\circ$                               | 102.988(4)                                                   | 81.442(2)                                                                                        | 97.9090(10)                                                                        |
| $\gamma/^\circ$                              | 90                                                           | 88.936(2)                                                                                        | 91.0120(10)                                                                        |
| $V/\text{\AA}^3$                             | 2471.95(17)                                                  | 3387.59(15)                                                                                      | 2332.71(6)                                                                         |
| $Z$                                          | 4                                                            | 2                                                                                                | 2                                                                                  |
| Reflections unique                           | 26766                                                        |                                                                                                  |                                                                                    |
| Reflections observed<br>[ $I > 2\sigma(I)$ ] | 5035                                                         |                                                                                                  |                                                                                    |
| Parameters                                   | 351                                                          |                                                                                                  |                                                                                    |
| $R_I(\text{obs})$                            | 0.0623                                                       |                                                                                                  |                                                                                    |
| $wR_2(\text{obs})$                           | 0.1458                                                       |                                                                                                  |                                                                                    |
| $\text{GooF}$                                | 1.078                                                        |                                                                                                  |                                                                                    |

**Table S10.** Hydrogen bonds in the compound **4**

| Eleven hydrogen bonds formed between $\beta$ -octamolybdate and $[\text{Co}(\text{C}_2\text{O}_4)(\text{NH}_3)_4]^+$ in <b>4</b> |             |
|----------------------------------------------------------------------------------------------------------------------------------|-------------|
| N1–H1A...O6 <sup>a</sup>                                                                                                         | 3.056(11) Å |
| N1–H1B...O7 <sup>b</sup>                                                                                                         | 3.087(11) Å |
| N4–H4A...O10 <sup>c</sup>                                                                                                        | 2.988(11) Å |
| N5–H5A...O2 <sup>b</sup>                                                                                                         | 2.952(10) Å |
| N5–H5C...O9 <sup>b</sup>                                                                                                         | 2.873(10) Å |
| N10–H10A...O1 <sup>d</sup>                                                                                                       | 3.204(11) Å |
| N15–H15B...O8 <sup>e</sup>                                                                                                       | 3.062(10) Å |
| N15–H15A...O12 <sup>e</sup>                                                                                                      | 3.011(11) Å |
| N15–H15C...O7 <sup>d</sup>                                                                                                       | 3.133(11) Å |
| N16–H16A...O4 <sup>c</sup>                                                                                                       | 3.033(10) Å |
| N16–H16A...O12 <sup>e</sup>                                                                                                      | 3.320(11) Å |

**a = -x,2-y,-z; b = x,y,z; c = -1+x,y,z; d = x,-1+y,z; e = -x,1-y,-z;**

| Eleven hydrogen bonds formed between $\gamma$ -octamolybdate and $[\text{Co}(\text{C}_2\text{O}_4)(\text{NH}_3)_4]^+$ in <b>4</b> |             |
|-----------------------------------------------------------------------------------------------------------------------------------|-------------|
| N2–H2C...O26 <sup>a</sup>                                                                                                         | 3.003(12) Å |
| N6–H6C...O17 <sup>b</sup>                                                                                                         | 3.032(11) Å |
| N7–H7B...O23 <sup>a</sup>                                                                                                         | 3.181(11) Å |
| N7–H7C...O23 <sup>b</sup>                                                                                                         | 3.099(11) Å |
| N7–H7C...O20 <sup>c</sup>                                                                                                         | 3.260(10) Å |
| N8–H8C...O23 <sup>b</sup>                                                                                                         | 3.223(10) Å |
| N8–H8C...O23 <sup>b</sup>                                                                                                         | 3.069(11) Å |
| N11–H11B...O19 <sup>a</sup>                                                                                                       | 3.380(10) Å |
| N11–H11C...O24 <sup>a</sup>                                                                                                       | 3.089(10) Å |
| N12–H12C...O15 <sup>d</sup>                                                                                                       | 3.185(10) Å |
| N13–H13B...O15 <sup>d</sup>                                                                                                       | 2.831(11) Å |

**a = 1-x,1-y,1-z; b = x,1+y,z; c = 1-x,2-y,1-z; d = x,y,z**

**Table S11.** Hydrogen bonds in the compound **8**

| <b>Eleven hydrogen bonds formed between <math>\gamma</math>-octamolybdate and <math>[\text{Co}(\text{C}_2\text{O}_4)(\text{NH}_3)_4]^+</math> in <b>8</b></b> |            |
|---------------------------------------------------------------------------------------------------------------------------------------------------------------|------------|
| N1–H1C...O2 <sup>a</sup>                                                                                                                                      | 3.002(9) Å |
| N1–H1A...O8 <sup>a</sup>                                                                                                                                      | 3.089(9) Å |
| N3–H3B...O16 <sup>b</sup>                                                                                                                                     | 2.992(9) Å |
| N4–H4C...O16 <sup>b</sup>                                                                                                                                     | 3.004(9) Å |
| N5–H5B...O2 <sup>c</sup>                                                                                                                                      | 3.129(7) Å |
| N5–H5B...O4 <sup>c</sup>                                                                                                                                      | 3.033(7) Å |
| N6–H6C...O2 <sup>c</sup>                                                                                                                                      | 3.139(7) Å |
| N7–H7A...O14 <sup>b</sup>                                                                                                                                     | 3.041(7) Å |
| N7–H7B...O10 <sup>d</sup>                                                                                                                                     | 3.184(7) Å |
| N7–H7C...O4 <sup>c</sup>                                                                                                                                      | 2.993(7) Å |
| N8–H8A...O16 <sup>b</sup>                                                                                                                                     | 3.319(7) Å |

**a** =  $x, 1+y, z$ ; **b** =  $-1/2+x, 1-y, z$ ; **c** =  $1-x, 1/2+y, 3/2-z$ ; **d** =  $1-x, 3/2+y, 3/2-z$



**Table S12.** Hydrogen bonds in the compound **9**

| Eleven hydrogen bonds formed between {Mo <sub>8</sub> O <sub>24</sub> } and [Co(C <sub>2</sub> O <sub>4</sub> )(NH <sub>3</sub> ) <sub>4</sub> ] <sup>+</sup> in <b>9</b> |             |
|---------------------------------------------------------------------------------------------------------------------------------------------------------------------------|-------------|
| N1–H1A...O12 <sup>a</sup>                                                                                                                                                 | 3.156(9) Å  |
| N1–H1C...O9 <sup>b</sup>                                                                                                                                                  | 3.079(10) Å |
| N2–H2A...O2 <sup>c</sup>                                                                                                                                                  | 2.857(10) Å |
| N2–H2B...O7 <sup>b</sup>                                                                                                                                                  | 2.983(9) Å  |
| N3–H3A...O5 <sup>c</sup>                                                                                                                                                  | 3.075(9) Å  |
| N5–H5B...O9 <sup>d</sup>                                                                                                                                                  | 3.277(10) Å |
| N6–H6C...O13 <sup>e</sup>                                                                                                                                                 | 3.163(10) Å |
| N7–H7A...O9 <sup>d</sup>                                                                                                                                                  | 2.995(11) Å |
| N7–H7B...O13 <sup>e</sup>                                                                                                                                                 | 3.064(11) Å |
| N8–H8A...O4 <sup>f</sup>                                                                                                                                                  | 2.977(10) Å |
| N8–H8B...O2 <sup>g</sup>                                                                                                                                                  | 3.328(10) Å |

**a** = 2-*x*,1-*y*,-*z*; **b** = *x*,*y*,*z*; **c** = -1+*x*,*y*,*z*; **d** = 3-*x*,1-*y*,1-*z*; **e** = -*x*,*y*,1+*z*; **f** = 3-*x*,2-*y*,1-*z*; **g** = 4-*x*,2-*y*,1-*z*

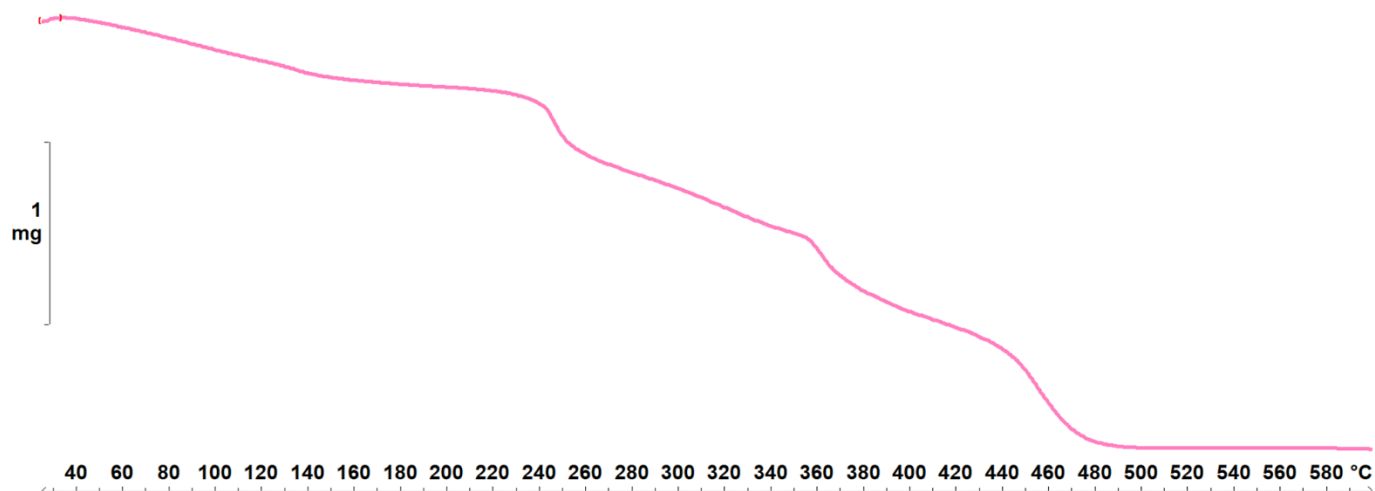

**Figure S1.** TG curve of  $[\text{Co}(\text{C}_2\text{O}_4)(\text{NH}_3)_4]_4[\beta\text{-Mo}_8\text{O}_{26}]\cdot 10\text{H}_2\text{O}$  (**1**)

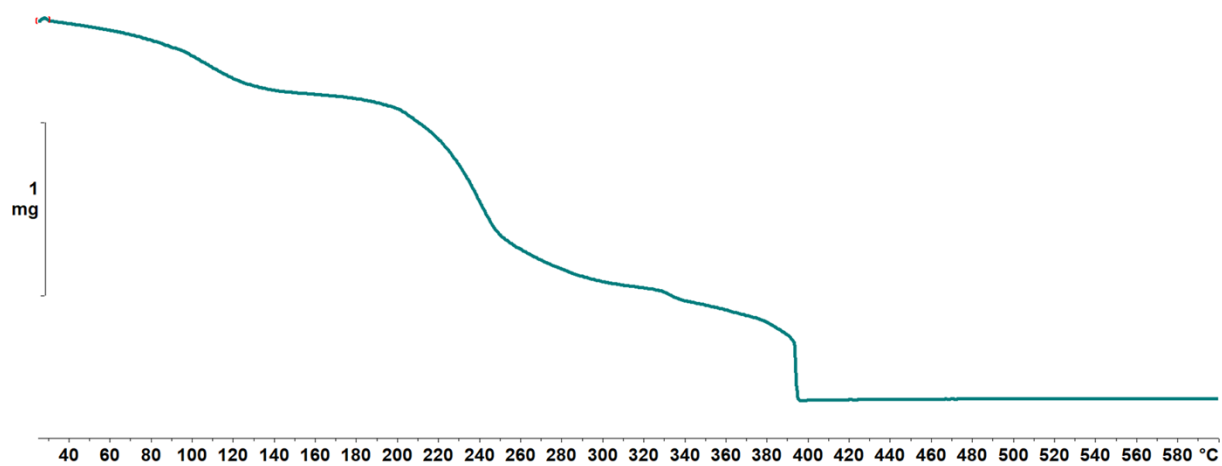

**Figure S2.** TG curve of  $[\text{Co}(\text{C}_2\text{O}_4)(\text{NH}_3)_4]_4[\beta\text{-Mo}_8\text{O}_{26}]\cdot 12\text{H}_2\text{O}$  (**2**)

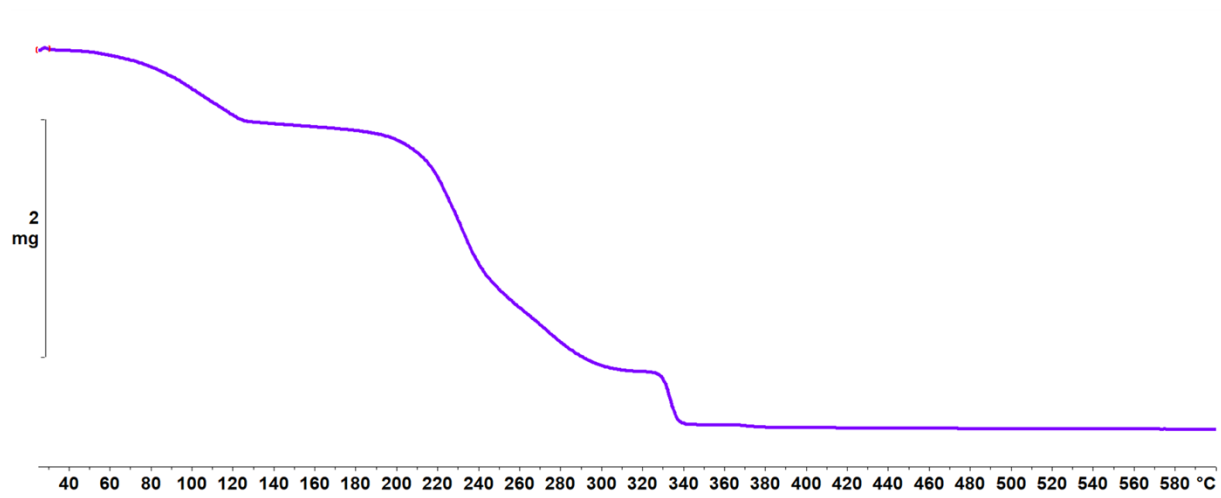

**Figure S3.** TG curve of  $[\text{Co}(\text{C}_2\text{O}_4)(\text{NH}_3)_4]_{4n}[\text{Na}_2\text{Mo}_8\text{O}_{29}(\text{H}_2\text{O})_4]_n \cdot 6n\text{H}_2\text{O}$  (**3**)

6

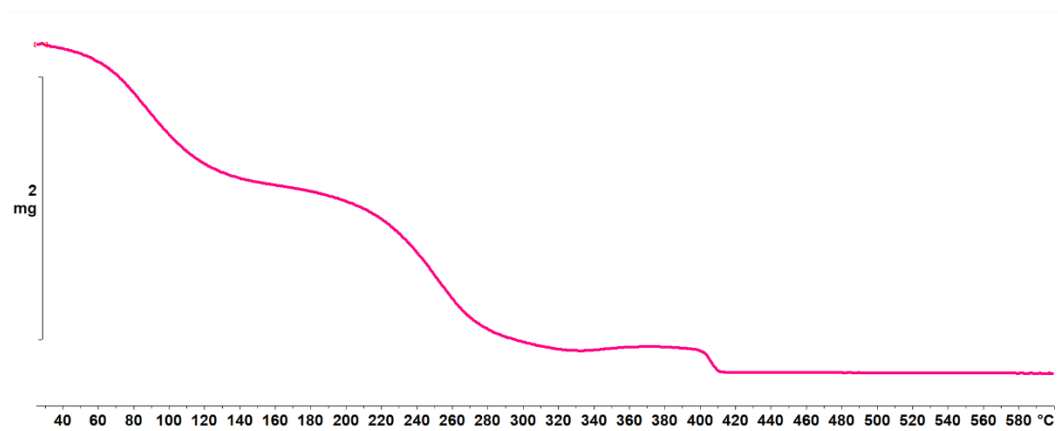

**Figure S4.** TG curve of  $[\text{Co}(\text{C}_2\text{O}_4)(\text{NH}_3)_4]_4[\beta\text{-Mo}_8\text{O}_{26}] \cdot 4\text{H}_2\text{O} \cdot \text{C}_4\text{H}_6\text{O}_4$  (**6**)

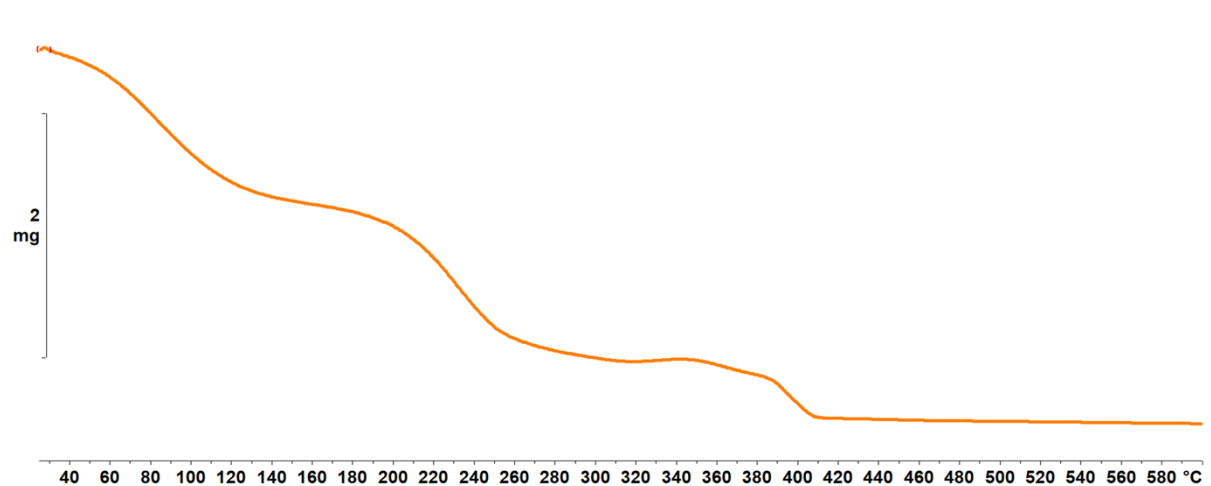

**Figure S5.** TG curve of  $[\text{Co}(\text{C}_2\text{O}_4)(\text{NH}_3)_4]_{2n}[\text{Mo}_4\text{O}_{12}(\text{H}_4\text{C}_4\text{O}_4)]_n \cdot 3n\text{H}_2\text{O}$  (**8**)

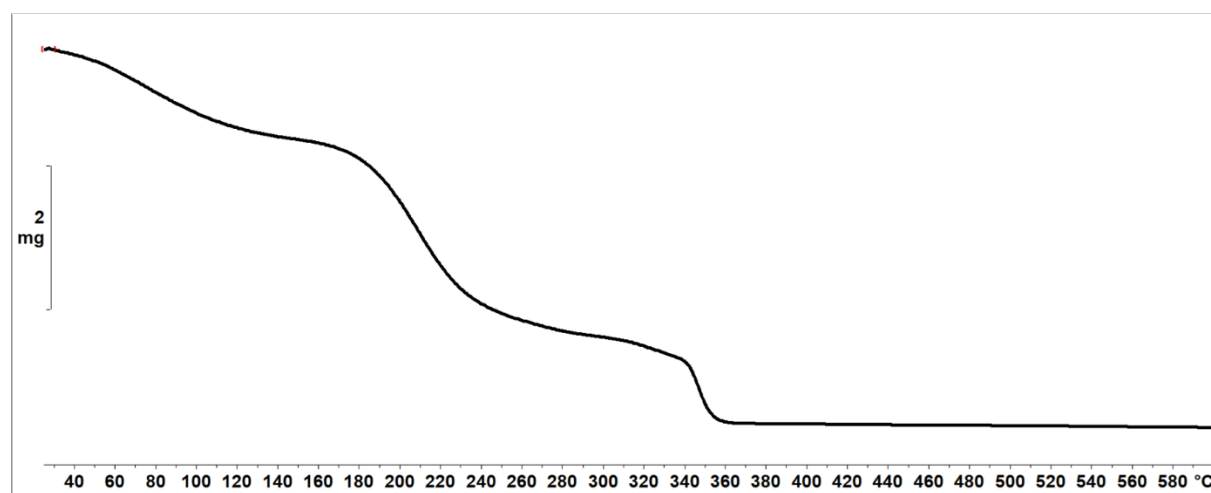

**Figure S6.** TG curve of  $[\text{Mo}_5\text{Co}_2\text{O}_{17}(\text{HCO}_3)(\text{H}_4\text{C}_4\text{O}_4\text{H})(\text{NH}_3)_7] \cdot 5\text{H}_2\text{O}$  (**10**)

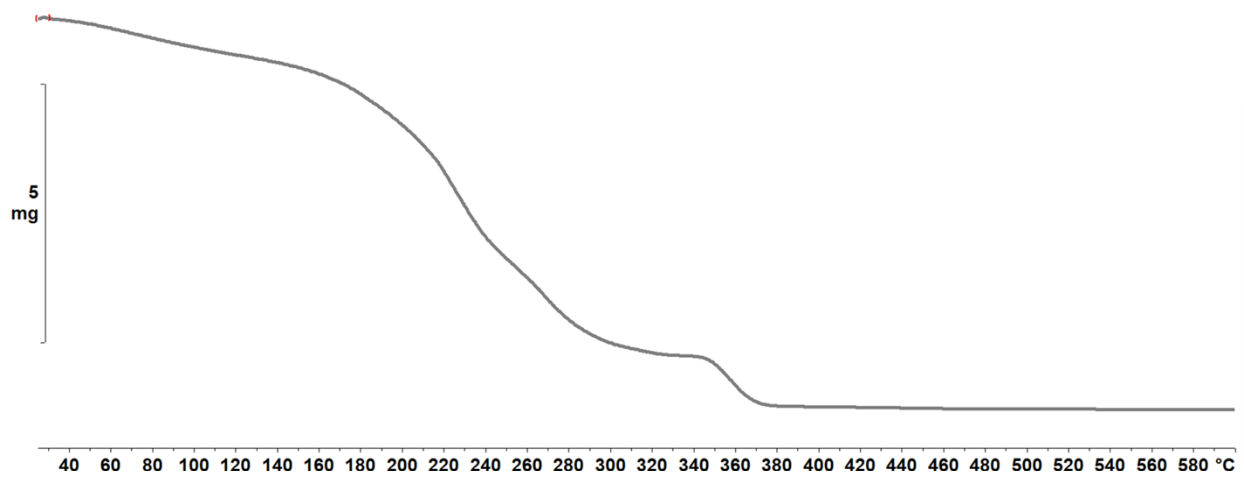

**Figure S7:** TG curve of  $[\text{Mo}_7\text{Co}_2\text{O}_{18}(\text{NH}_3)_7] \cdot 5\text{H}_2\text{O}$  (11)

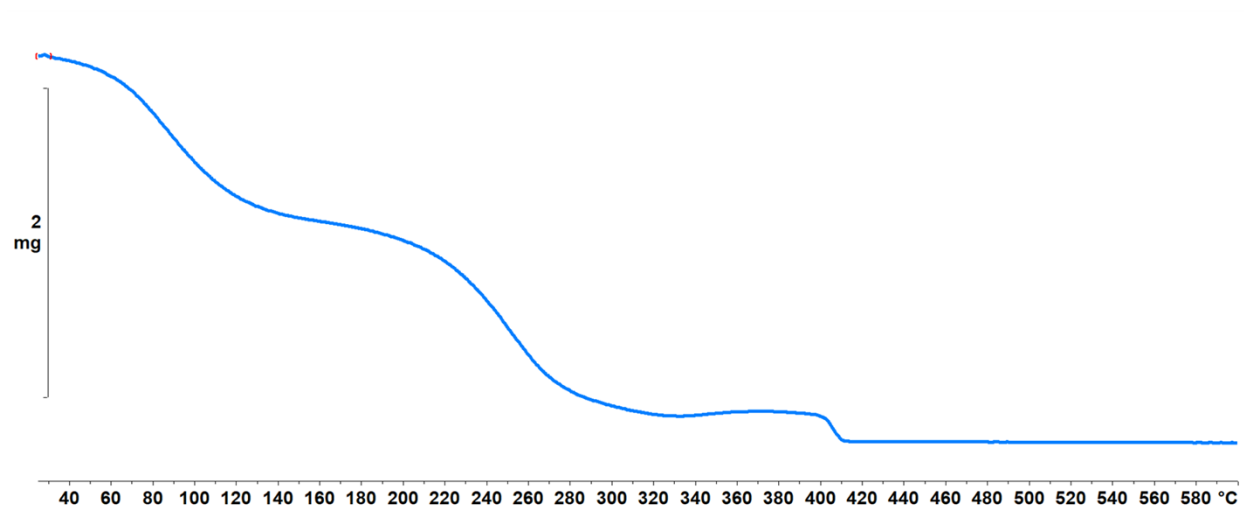

**Figure S8.** TG curve of  $[\text{Co}(\text{C}_2\text{O}_4)(\text{NH}_3)_4]_2[\text{H}_2\text{Mo}_8\text{V}_5\text{O}_{40}\text{Na}_2(\text{H}_2\text{O})_8] \cdot x\text{H}_2\text{O}$  (12)

The sample for the NMR experiments was prepared by dissolving it in NaOH solution in D<sub>2</sub>O. The resulting dark brown Co<sub>2</sub>O<sub>3</sub> oxide precipitated and the remaining solution was taken for the <sup>13</sup>C NMR measurements.

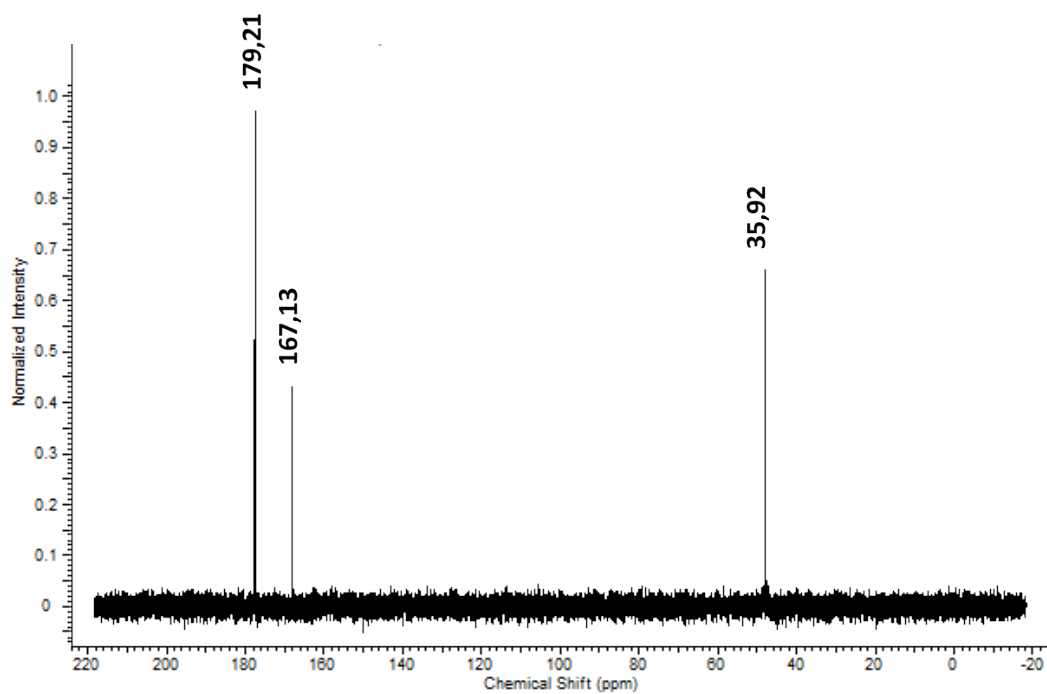

**Figure S9.** <sup>13</sup>C NMR spectrum of [Mo<sub>5</sub>Co<sub>2</sub>O<sub>17</sub>(HCO<sub>3</sub>)(H<sub>4</sub>C<sub>4</sub>O<sub>4</sub>H)(NH<sub>3</sub>)<sub>7</sub>] $\cdot$ 5H<sub>2</sub>O (**10**)

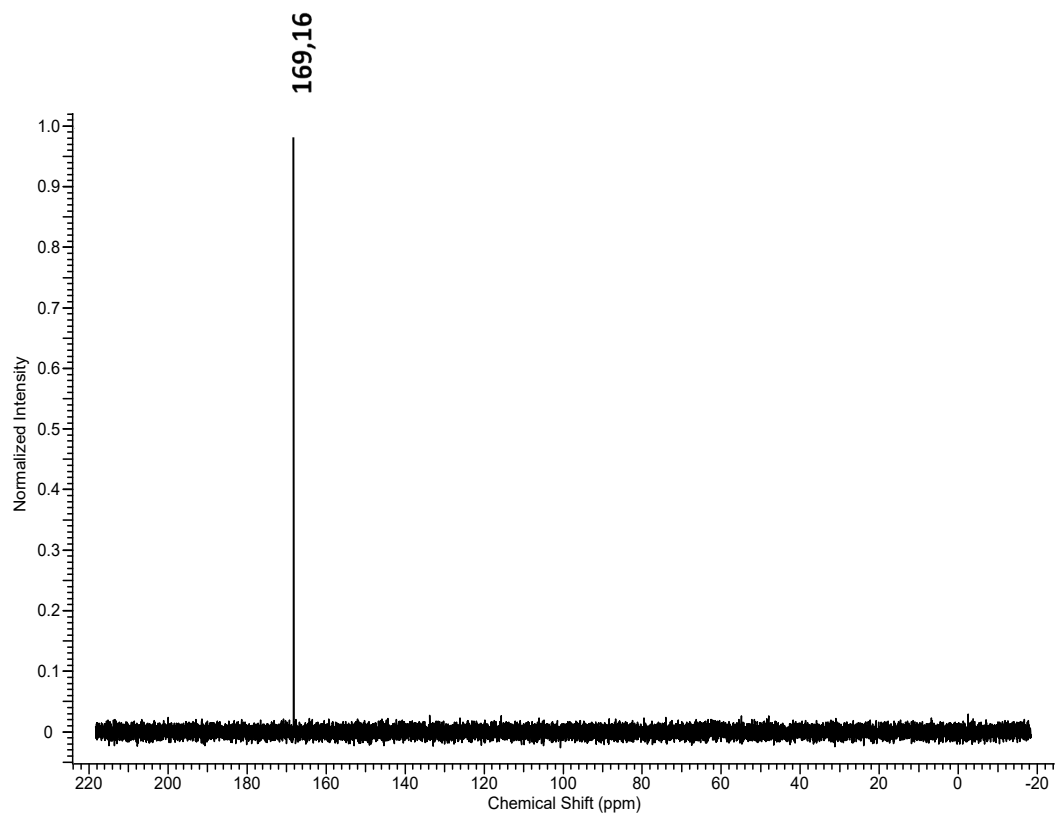

**Figure S10.** Example of  $^{13}\text{C}$  NMR spectra of  $[\text{Mo}_5\text{Co}_2\text{O}_{18}(\text{NH}_3)_7] \cdot 5\text{H}_2\text{O}$  (**11**) obtained in reactions with succinic acid

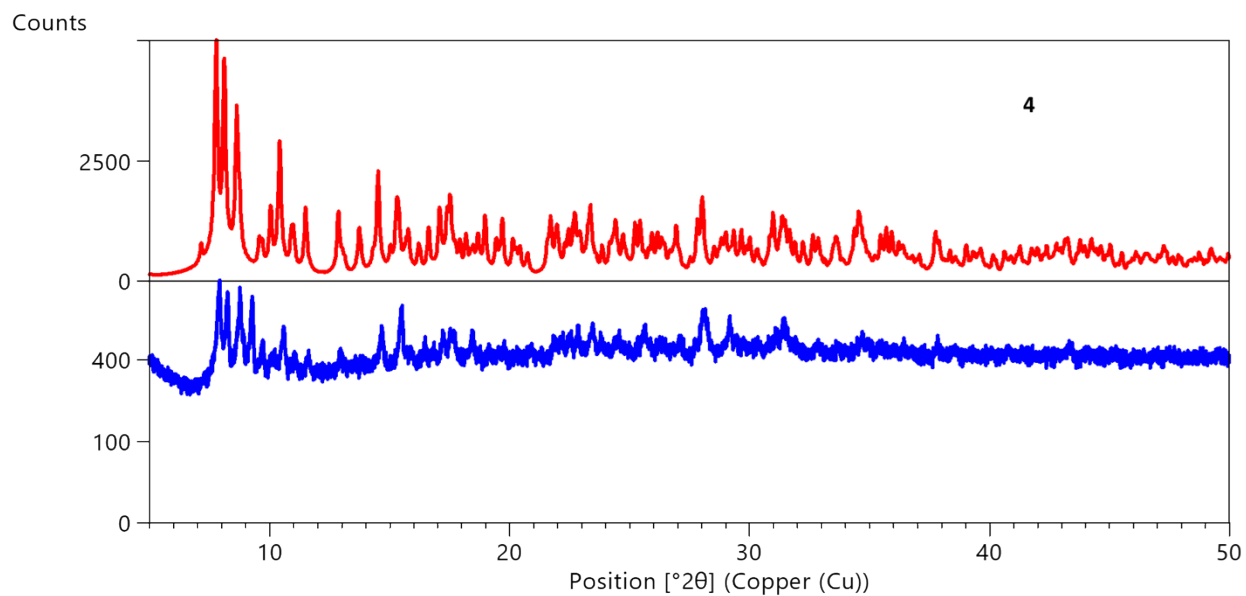

**Figure S11.** PXRD patterns of compound **4** (red-simulated pattern, blue-experimental pattern)

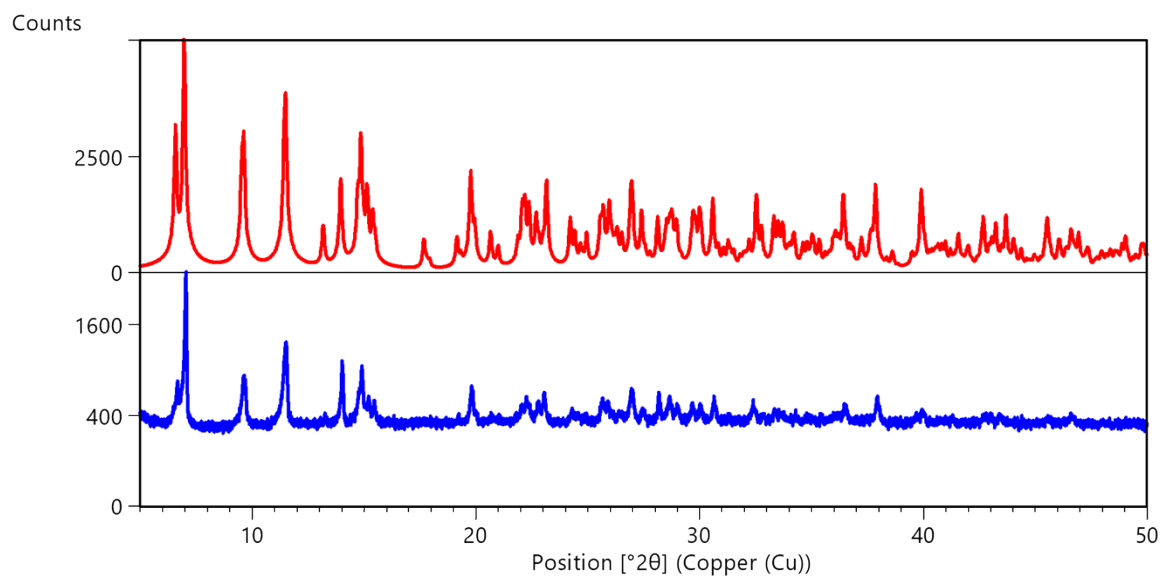

**Figure S12.** PXRD patterns of compound **6** (red-simulated pattern, blue-experimental pattern)



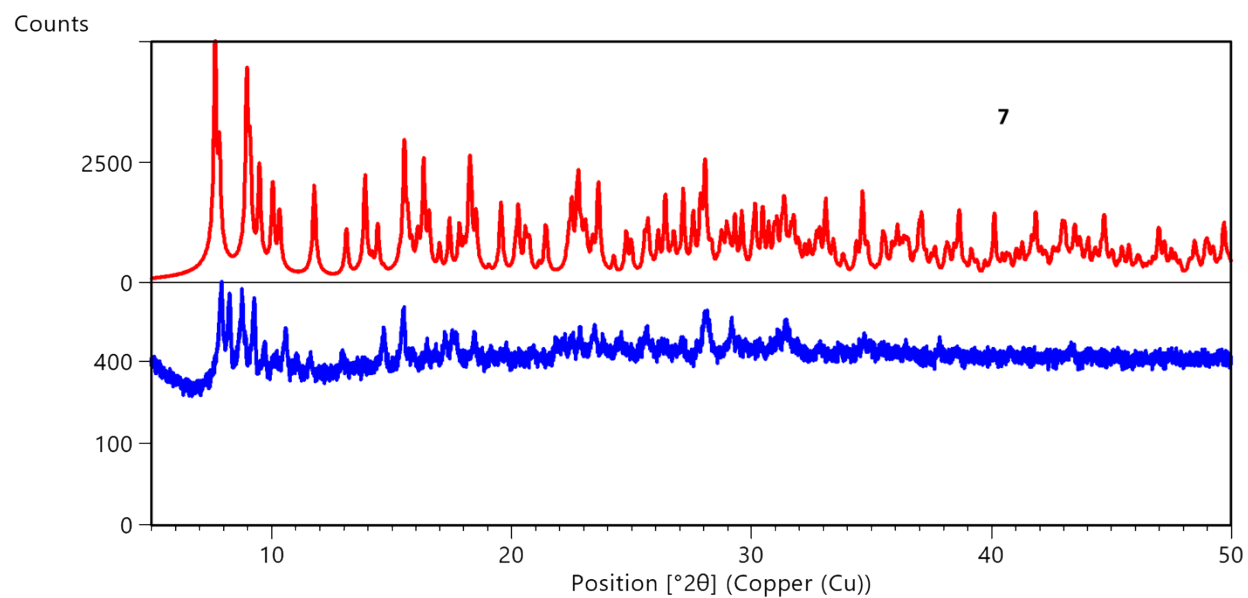

**Figure S13.** PXRD patterns of compound **7** (red-simulated pattern, blue-experimental pattern)

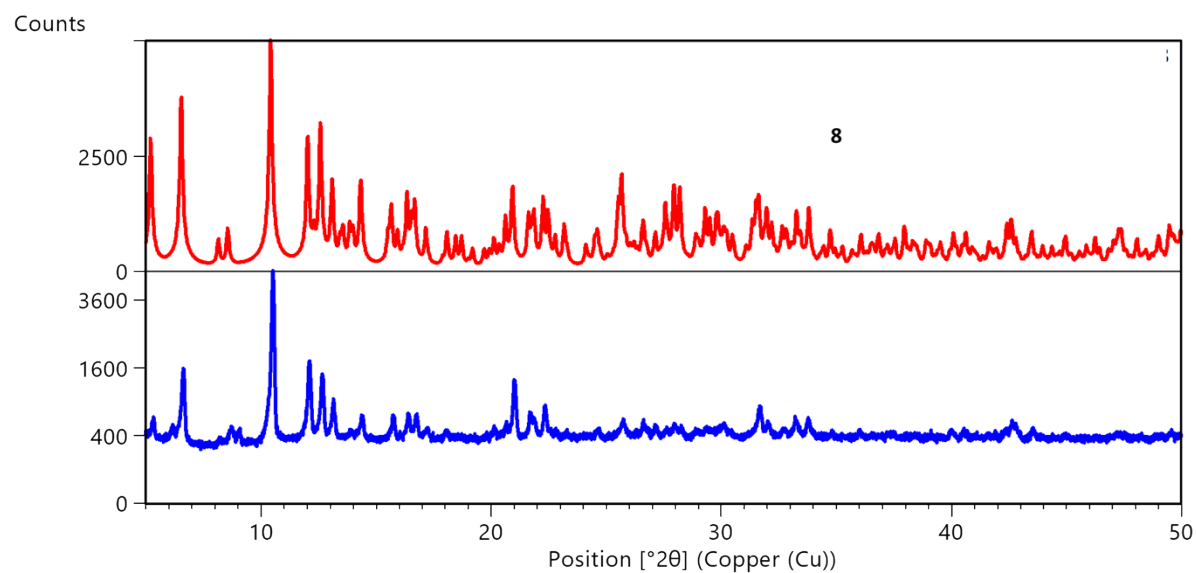

**Figure S14.** PXRD patterns of compound **8** (red-simulated pattern, blue-experimental pattern)

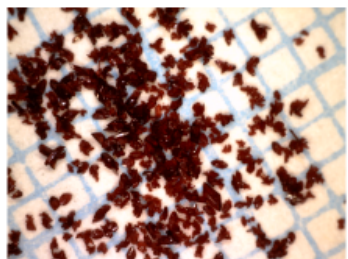

3 – pink plates

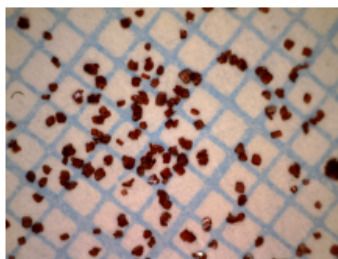

5 – pink prisms

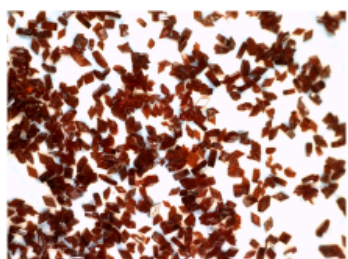

4 – pink prisms

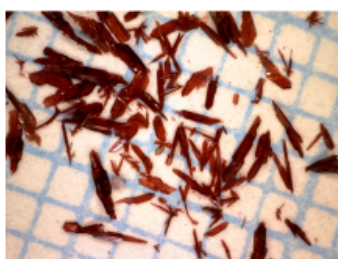

6 – pink prisms

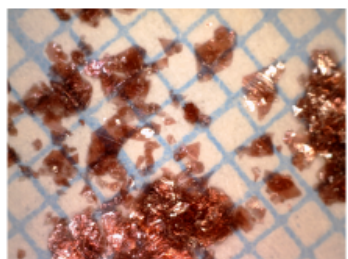

7 – light pink  
plates

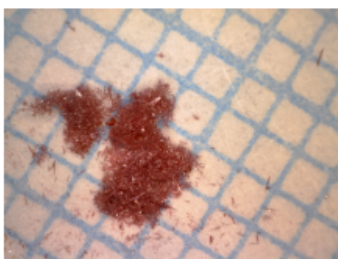

8 – light pink  
needles

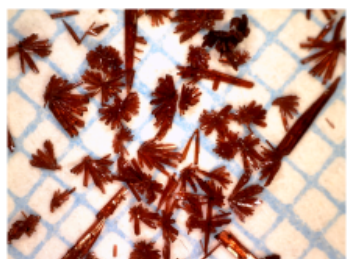

9 – pink rods

**Figure S15.** Crystals of compounds 3-9
